# Supplementary material
Source: publisher site journal article supplement (https://www.dovepress.com/article/437941)
Supplement: Supplementary file 1 [file get_supplementary_file.php]

**Evaluation of Knowledge of Risk Factors and Warning Signs of Stroke –a cross sectional Study Among Saudi public In Riyadh, Saudi Arabia ( تقييم المعرفة بعوامل الخطر والعلامات التحذيرية للسكتة الدماغية – دراسة مقطعية بين الجمهور السعودي في الرياض، المملكة العربية السعودية)**

1. **Gender(جنس)**
2. Male (ذكر)
3. Female(إناثا)
4. **Age in years(العمر بالسنين)**
5. 20-24
6. 25-30
7. 31-35
8. 36-40
9. 41-45
10. >46
11. **Educational qualification( المؤهل التعليمي)**
12. Primary School(مدرسة إبتدائية)
13. Secondary or equivalent (.مدرسة ثانوية)
14. University degree( شهادة جامعية)
15. **Working status?(** **وضع العمل)**
16. Housewife(ربه منزل)
17. Unemployed( غير موظف)
18. Employed (موظف)
19. Student( طالب)
20. **Parents who work in the healthcare sector(الآباء الذين يعملون في قطاع الرعاية الصحية)**
21. Yes(نعم)
22. No(لا)
23. **A stroke or brain attack happens when blood flow to your brain is stopped(تحدث السكتة الدماغية أو نوبة الدماغ عندما يتوقف تدفق الدم إلى دماغك)**
24. Yes(نعم)
25. No (لا)
26. I don’t know (لا أعرف)
27. **A stroke affects the ability to move eat and other body function(تؤثر السكتة الدماغية على القدرة على تحريك الطعام ووظائف الجسم الأخرى)**
28. Yes(نعم)
29. No (لا)
30. I don’t know (لا أعرف)
31. **Window period of thrombolysis (In hours)(** **فترة نافذة انحلال الخثرة (بالساعات))**
32. 0-4.5 hours
33. 4.5-6 hours
34. 12-24 hours
35. >24 hours

**Part-2- Participant's knowledge of risk factors of strokes ( معرفة المشاركين بعوامل خطر الإصابة بالسكتات الدماغية)**

| **1. Hypertension(ارتفاع ضغط الدم)**   1. True(حقيقي) 2. False(خطأ \ زائف) 3. I don’t know(لا أعرف) |
| --- |
| **2. Hyperlipidemia(فرط شحميات الدم)**   1. True(حقيقي) 2. False(خطأ \ زائف) 3. I don’t know(لا أعرف) |
| **3. Heart disease(مرض القلب)**   1. True(حقيقي) 2. False(خطأ \ زائف) 3. I don’t know(لا أعرف) |
| **4. Alcohol(الكحول)**   1. True(حقيقي) 2. False(خطأ \ زائف) 3. I don’t know(لا أعرف) |
| **5. Tobacco(التبغ)**   1. True(حقيقي) 2. False(خطأ \ زائف) 3. I don’t know(لا أعرف) |
| **6.Birth control pills(حبوب منع الحمل)**   1. True(حقيقي) 2. False(خطأ \ زائف) 3. I don’t know(لا أعرف) |
| **7.High red blood cell count(ارتفاع عدد خلايا الدم الحمراء)**   1. True(حقيقي) 2. False(خطأ \ زائف) 3. I don’t know(لا أعرف) |
| **8. Older age(كبار السن)**   1. True(حقيقي) 2. False(خطأ \ زائف) 3. I don’t know(لا أعرف) |
| **9.Gender(جنس)**   1. True(حقيقي) 2. False(خطأ \ زائف) 3. I don’t know(لا أعرف) |
| **10.Heredity or genetics(الوراثة أو الجينات)**   1. True(حقيقي) 2. False(خطأ \ زائف) 3. I don’t know(لا أعرف) |
| **11.History of prior stroke(تاريخ السكتة الدماغية السابقة)**   1. True(حقيقي) 2. False(خطأ \ زائف) 3. I don’t know(لا أعرف) |
| **12.Lack of exercise(عدم ممارسة الرياضة)**   1. True(حقيقي) 2. False(خطأ \ زائف) 3. I don’t know(لا أعرف) |

**Section -3 warning signs of strokes (القسم -3 العلامات التحذيرية للسكتات الدماغية)**

| **1. Blurred vision in 1 or both eyes(عدم وضوح الرؤية في إحدى العينين أو كلتيهما)**   1. True(حقيقي) 2. False(خطأ \ زائف) 3. I don’t know(لا أعرف) |
| --- |
| **2. Chest pain or heart palpitations(ألم في الصدر أو خفقان القلب)**   1. True(حقيقي) 2. False(خطأ \ زائف) 3. I don’t know(لا أعرف) |
| **3. Difficulty in speaking and understanding or slurred speech(3. صعوبة في التحدث والفهم أو تداخل في الكلام)**   1. True(حقيقي) 2. False(خطأ \ زائف) 3. I don’t know(لا أعرف) |
| **4.Dizziness(دوخة)**   1. True(حقيقي) 2. False(خطأ \ زائف) 3. I don’t know(لا أعرف) |
| **5.Numbness or weakness of the face and or limb of the body(تنميل أو ضعف في الوجه أو أحد أطراف الجسم)**   1. True(حقيقي) 2. False(خطأ \ زائف) 3. I don’t know(لا أعرف) |
| **6.Severe headache with unknown cause(6. الصداع الشديد مجهول السبب)**   1. True(حقيقي) 2. False(خطأ \ زائف) 3. I don’t know(لا أعرف) |
| **7.Shortness of breath(ضيق في التنفس)**   1. True(حقيقي) 2. False(خطأ \ زائف) 3. I don’t know(لا أعرف) |

**Section-4 Reactions to stroke patients (القسم 4 ردود الفعل لمرضى السكتة الدماغية)**

| **1. I will call the ambulance(سأتصل بسيارة الإسعاف)**   1. Yes(نعم) 2. No (لا) |
| --- |
| **2. I will give home remedies(سوف أعطي العلاجات المنزلية)**   1. Yes(نعم) 2. No (لا) |
| **3. I will give the patient the first painkiller to control the pain(سأعطي المريض أول مسكن للألم للسيطرة على الألم)**   1. Yes(نعم) 2. No (لا) |
| **4. I won't do anything to let the patient recover by him/herself(لن أفعل أي شيء للسماح للمريض بالتعافي بنفسه)**   1. Yes(نعم) 2. No (لا) |
| **5. I will take the patient to the hospital immediately(سأنقل المريض إلى المستشفى على الفور)**   1. Yes(نعم) 2. No (لا)   6. **I don’t know** what to do (أنا لا أعرف ما يجب القيام به)  7. **Your source of information for the management of stroke (multiple choice, you can choose more than one answer)(** **مصدر معلوماتك لإدارة السكتة الدماغية (الاختيار من متعدد، يمكنك اختيار أكثر من إجابة))**   1. Medical doctor (طبيب) 2. Pharmacist(صيدلاني) 3. Nurses(ممرضة) 4. Others (آحرون) 5. Friends and Relatives (الأصدقاء والأقارب) 6. Newspapers or magazine (الصحف أو المجلات) 7. Textbooks and internet (الكتب المدرسية والإنترنت) |
|  |
